# Supplementary material
Source: HighWire-hosted journal article supplement (https://msystems.asm.org/content/5/1/e00905-19)
Supplement: inline-supplementary-material-1 [file inline-supplementary-material-1.pdf]

# Genome mining flowchart

A

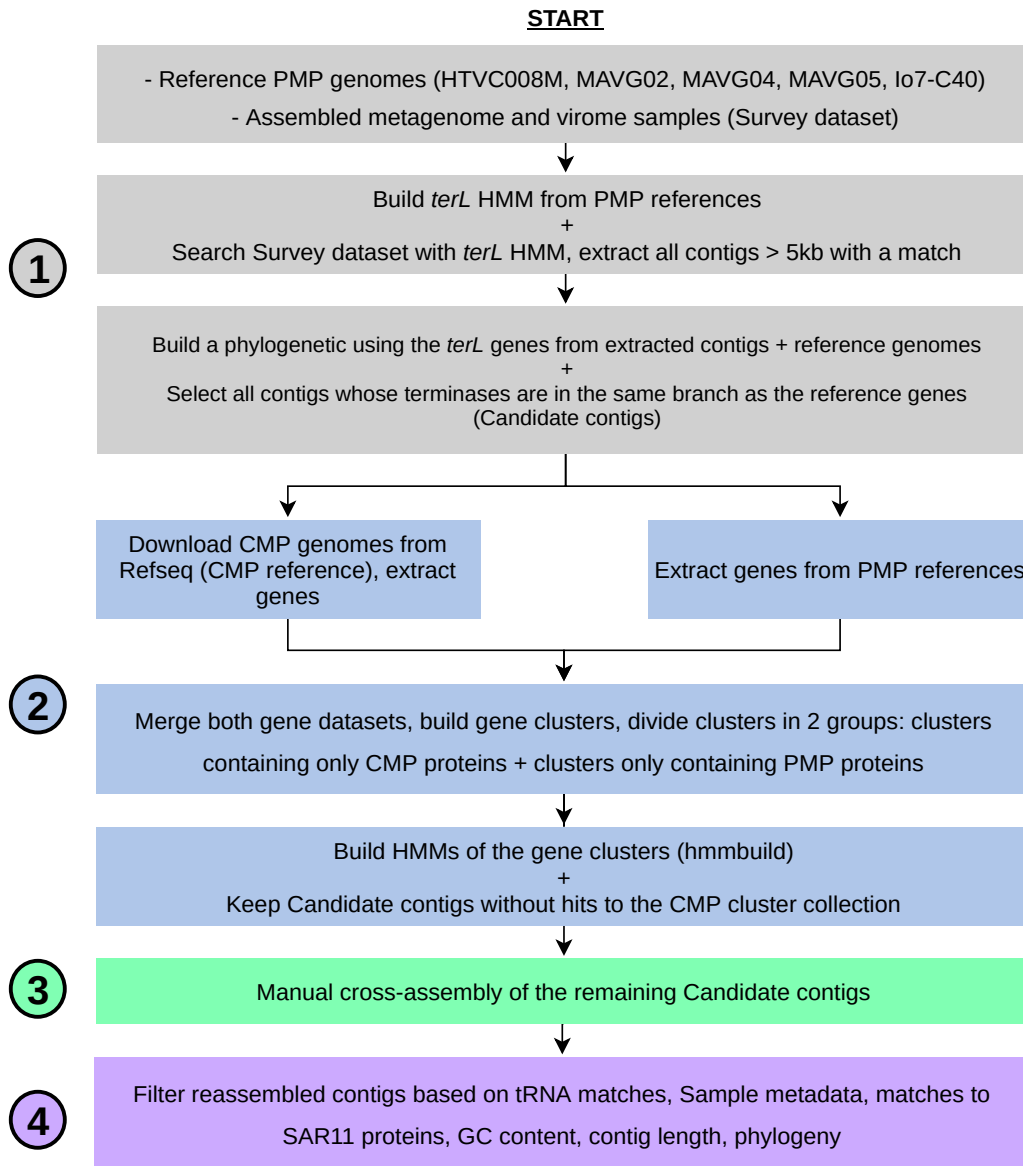

B

|            | Step                       | #Contigs | Average contig size (kbp) |
|------------|----------------------------|----------|---------------------------|
| <b>1</b> → | <i>terL</i> hmm filtering  | 126,467  | 12.56                     |
| <b>2</b> → | Gene cluster hmm filtering | 30,331   | 25.89                     |
| <b>3</b> → | Manual cross-assembly      | 28,431   | 26.42                     |
|            | Duplicate removal          | 14,748   | 28.30                     |
| <b>4</b> → | Contigs > 100kbp           | 688      | 152.05                    |
|            | GC% between 30 – 35        | 197      | 143.03                    |
|            | Phylogeny + Gene filtering | 31       | 137.19                    |
